# Supplementary material
Source: publisher figshare collection journal article supplement (https://karger.figshare.com/ndownloader/files/35906843)
Supplement: Supplementary file 1 [file 35906843]

**SURVEY OF CMV AWARENESS AMONG FIRST TRIMESTER PREGNANT WOMEN**

#
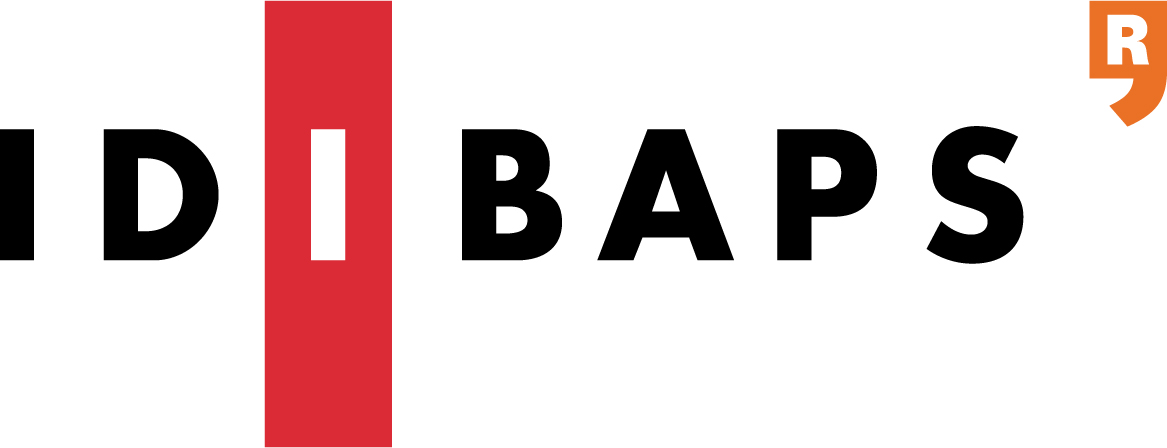


Thank you very much for answering this questionnaire which will only take a few minutes and is completely anonymous and voluntary. We want to evaluate how much pregnant women know about one of the most common infections in mothers and infants and their participation will help us educate the population about it, including forms of transmission and prevention.

Please read the following questions and answer honestly. There are no wrong answers.

**Important information before starting the questionnaire:**

a) How old are you?

b) How many children do you have?

c) Do you have children under 3 years of age? Yes ( ) No ( )

d) Do you take care of, or work with children under 3 years of age? Yes ( ) No ( )

e) What is your country of origin?

f) What is your level of education?

1. Elementary School

2. High School

3. Technical School

4. University

5. None

1. **Do you know, or have you heard about Cytomegalovirus (CMV) infection?**

Yes ( ) No ( ) Don't know / don't remember ( )

2. **Has your doctor / midwife informed you about CMV infection during pregnancy?**

Yes ( ) No ( ) Don't know / don't remember ( )

3. **Answer true or false:**

CMV infection does not cause symptoms in most babies but can sometimes be dangerous.

True (x) False ( )

4. **Select one or more answers that you consider correct:**

You are likely to get CMV infection ...

a) When eating raw or undercooked meat, chicken, fish.

b) Can spread through the air

c) When having contact with cats

d) By mosquito bites

e) Contact with saliva or urine of young children

5. **Do you think that CMV infection can be prevented in any way?**

Yes (x) No ( ) Don't know / don't remember ( )

6. **Select one or more answers that you consider correct:**

To reduce the risk of contracting CMV infection during pregnancy, you should ...

a. Avoid contact with cats.

b. Avoid travelling to tropical countries due to the risk of mosquito bites.

c. Do not kiss on the mouth and do not share food or utensils with young children.

d. Get vaccinated against CMV.

e. Wash your hands with hot water or soap after changing diapers.

F. There is no way to prevent CMV infection.

7. **Do you consider that, during pregnancy, you should receive information about infection with CMV?**

Yes (x) No ( ) Don't know ( )

**Supplementary material 2.-** Survey provided to 700 pregnant women who attended for routine first-trimester scan between 11 and 13 + 6 weeks at the Fetal-Maternal Department, BCNatal-Hospital Clínic, Barcelona. **Correct answers are underlined.*
